# Supplementary material for: Convergent shifts in host-associated microbial communities across environmentally elicited phenotypes
Source: PubMed Central journal article supplement (PMC5838112; doi:10.1038/s41467-018-03383-w), 2018-03-05
Supplement: 41467_2018_3383_MOESM1_ESM.pdf [file 41467_2018_3383_MOESM1_ESM.pdf]

**Authors:** Tyler J. Carrier and Adam M. Reitzel

**Title:** Convergent shifts in host-associated microbial communities across environmentally elicited phenotypes

**File name:** Supplementary Documentation

**Description:** Supplementary Figures and Supplementary Tables

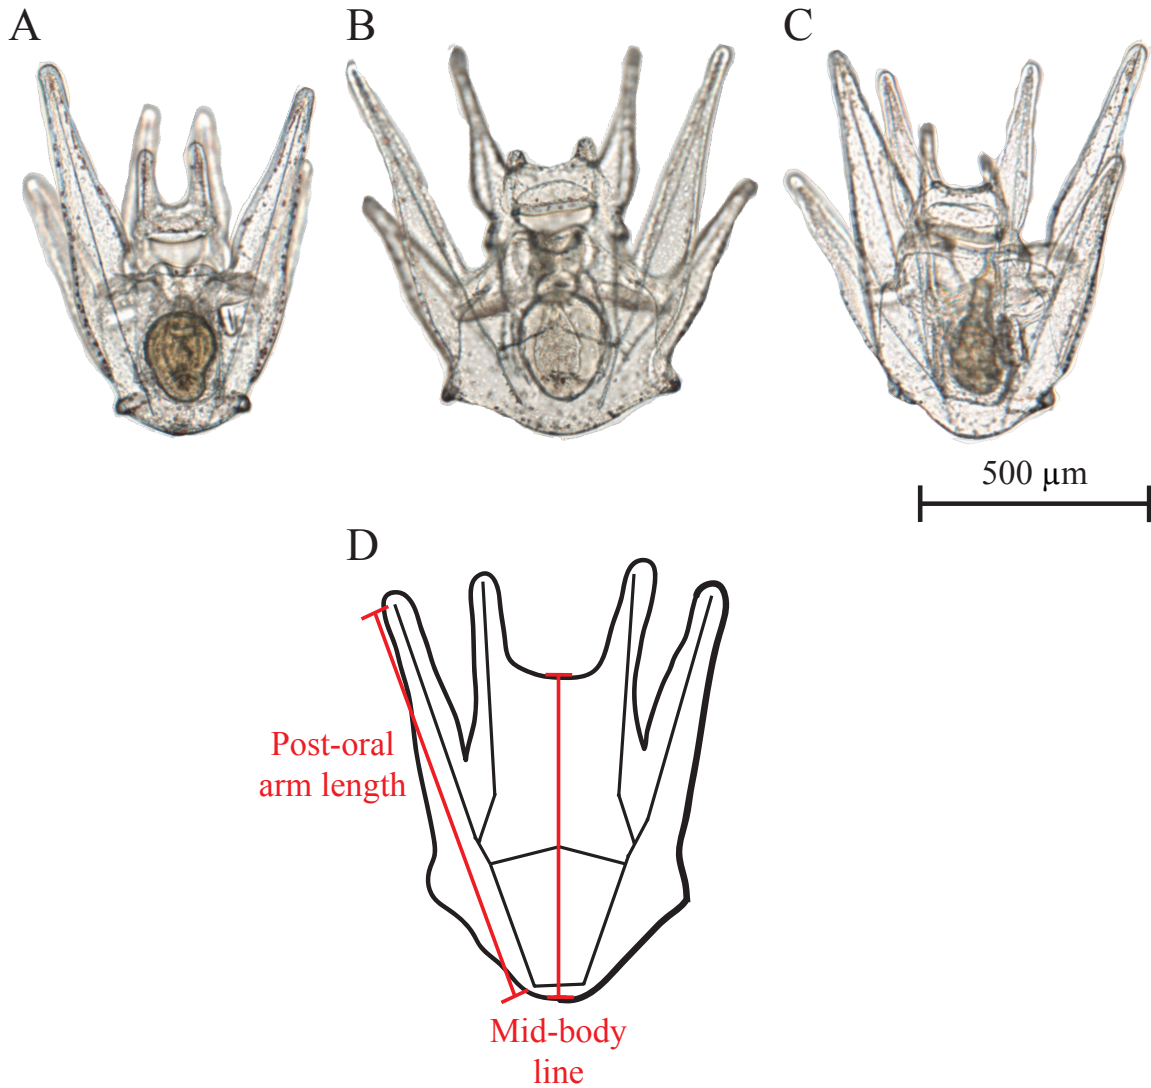

**Supplementary Figure 1.** Photograph of each species of echinoid larvae and representative cartoon. Microphotograph of 8-arm *Strongylocentrotus purpuratus* (A), 6-arm *Mesocentrotus franciscanus* (B), and 8-arm *S. droebachiensis* (C) larva, and (D) cartoon of 4-arm echinoid larvae with pre-drawn line for post-oral arm and mid-body line measurements.

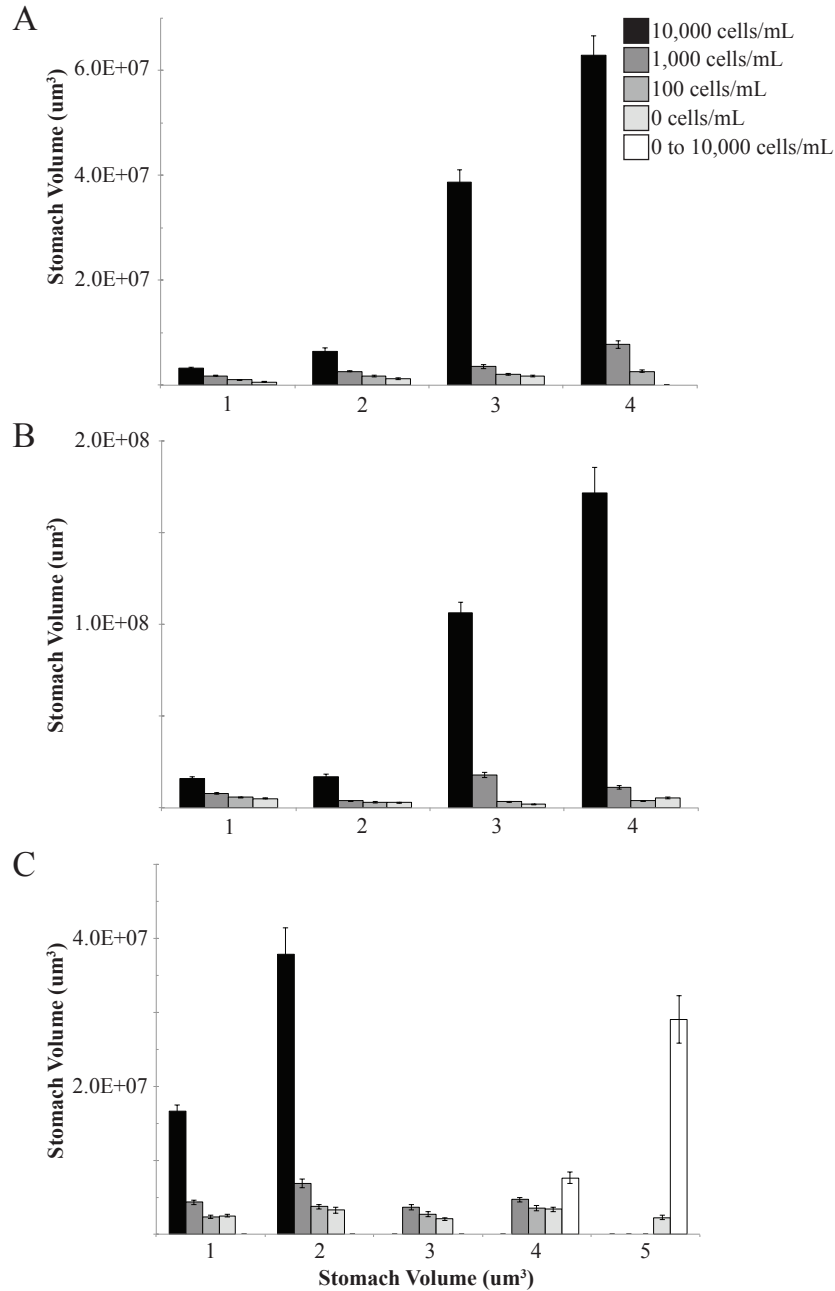

**Supplementary Figure 2.** Three species of echinoid larvae alter stomach volume based on feeding environment. Post-oral arm to mid body line ratio ( $\pm$  standard error;  $n=20$ ) for *Strongylocentrotus purpuratus* (A), *Mesocentrotus franciscanus* (B), and *S. droebachiensis* (C) larvae having been fed either 10,000 (black), 1,000 (dark grey), 100 (grey), and 0 cells $\cdot$ mL $^{-1}$  (light grey). For *S. droebachiensis*, larval stomach volume was also manipulated (white) by being fed 0 cells $\cdot$ mL $^{-1}$  for three weeks then transferred to 10,000 cells $\cdot$ mL $^{-1}$  for three weeks (*i.e.*, until metamorphosis). Data here correspond with Figure 1.

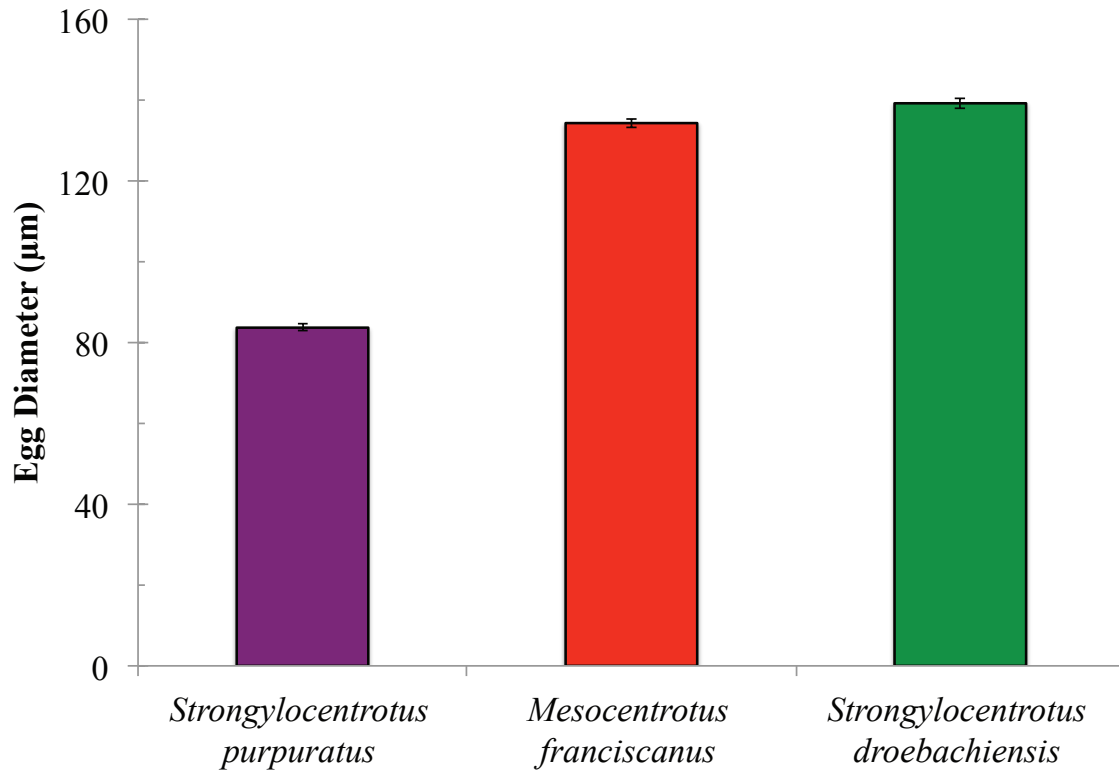

**Supplementary Figure 3.** Egg diameter for three species of echinoid larvae. Mean egg size ( $\pm$  standard error;  $n=20$ ) of unfertilized eggs for *Strongylocentrotus purpuratus*, *Mesocentrotus franciscanus*, and *S. droebachiensis*.

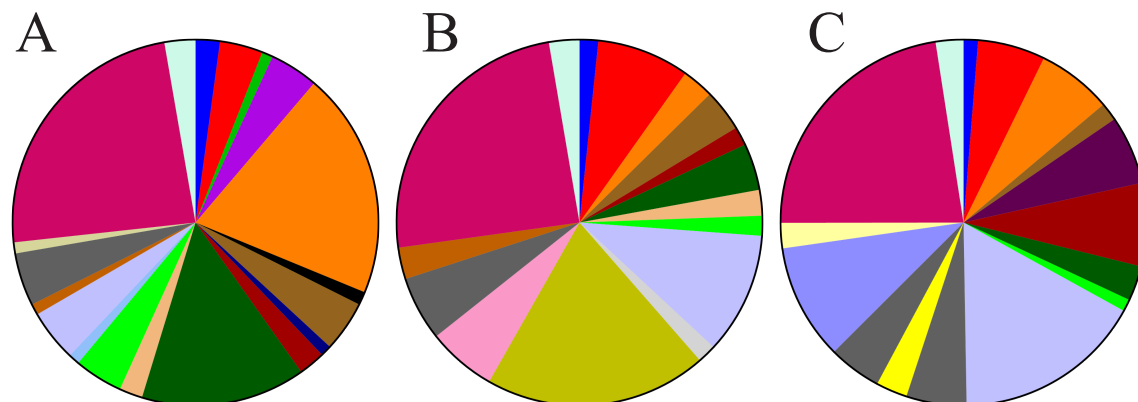

| Phylum          | Class               | Order               | Family              | Genus                   |                      |                   |
|-----------------|---------------------|---------------------|---------------------|-------------------------|----------------------|-------------------|
| Bacteroidetes   | Flavobacteriia      | Flavobacteriales    | Flavobacteriaceae   | N/A                     |                      |                   |
| Cyanobacteria   | Chloroplast         | Stramenopiles       | N/A                 | N/A                     |                      |                   |
| Planctomycetes  | Phycisphaerae       | Phycisphaerales     | N/A                 | N/A                     |                      |                   |
| Proteobacteria  | Alphaproteobacteria | Caulobacterales     | Caulobacteraceae    | N/A                     |                      |                   |
|                 |                     | Rhizobiales         | Bradyrhizobiaceae   | N/A                     |                      |                   |
|                 |                     | Rhodobacterales     | Hyphomonadaceae     | N/A                     |                      |                   |
|                 |                     |                     | Rhodobacteraceae    | N/A                     |                      |                   |
|                 |                     | Sphingomonadales    | N/A                 | N/A                     |                      |                   |
|                 |                     |                     | Sphingomonadaceae   | <i>Sphingomonas</i>     |                      |                   |
|                 |                     | Betaproteobacteria  | Methylophilales     | Methylophilaceae        | <i>Methylotenera</i> |                   |
|                 |                     | Gammaproteobacteria | Alteromonadales     | Alteromonadaceae        | N/A                  |                   |
|                 |                     |                     |                     |                         | <i>Alteromonas</i>   |                   |
|                 |                     |                     |                     |                         |                      | <i>ZD0117</i>     |
|                 |                     |                     |                     |                         | Other                |                   |
|                 |                     |                     |                     | Colwelliaceae           | N/A                  |                   |
|                 |                     |                     |                     |                         | <i>Colwellia</i>     |                   |
|                 |                     |                     |                     | J115                    | N/A                  |                   |
|                 |                     |                     |                     |                         | Other                |                   |
|                 |                     |                     |                     | Oceanospirillales       | Oceanospirillaceae   | <i>Oleibacter</i> |
|                 |                     |                     |                     |                         | <i>Oleispira</i>     |                   |
|                 |                     |                     |                     | Other                   |                      |                   |
|                 |                     |                     | Pseudomonadales     | Moraxellaceae           | <i>Perlucidibaca</i> |                   |
|                 |                     |                     |                     | Pseudomonadaceae        | <i>Pseudomonas</i>   |                   |
|                 |                     | Xanthomonadales     | Xanthomonadaceae    | <i>Stenotrophomonas</i> |                      |                   |
|                 |                     | Other               | Other               |                         |                      |                   |
| Verrucomicrobia | Verrucomicrobiae    | Verrucomicrobiales  | Verrucomicrobiaceae | <i>Persicirhabdus</i>   |                      |                   |
| Other           | Other               | Other               | Other               | Other                   |                      |                   |
| Unassigned      | Unassigned          | Unassigned          | Unassigned          | Unassigned              |                      |                   |

**Supplementary Figure 4.** Distribution of bacterial taxa associated with *Strongylocentrotus purpuratus* larvae along the phenotypic continuum. Genera associated with *S. purpuratus* larvae pre- (A) and post-expression (B, C) of phenotypic plasticity representing at least 1% of the community, with taxa less than 1% group as ‘other.’ Data correspond with Figure 2A.

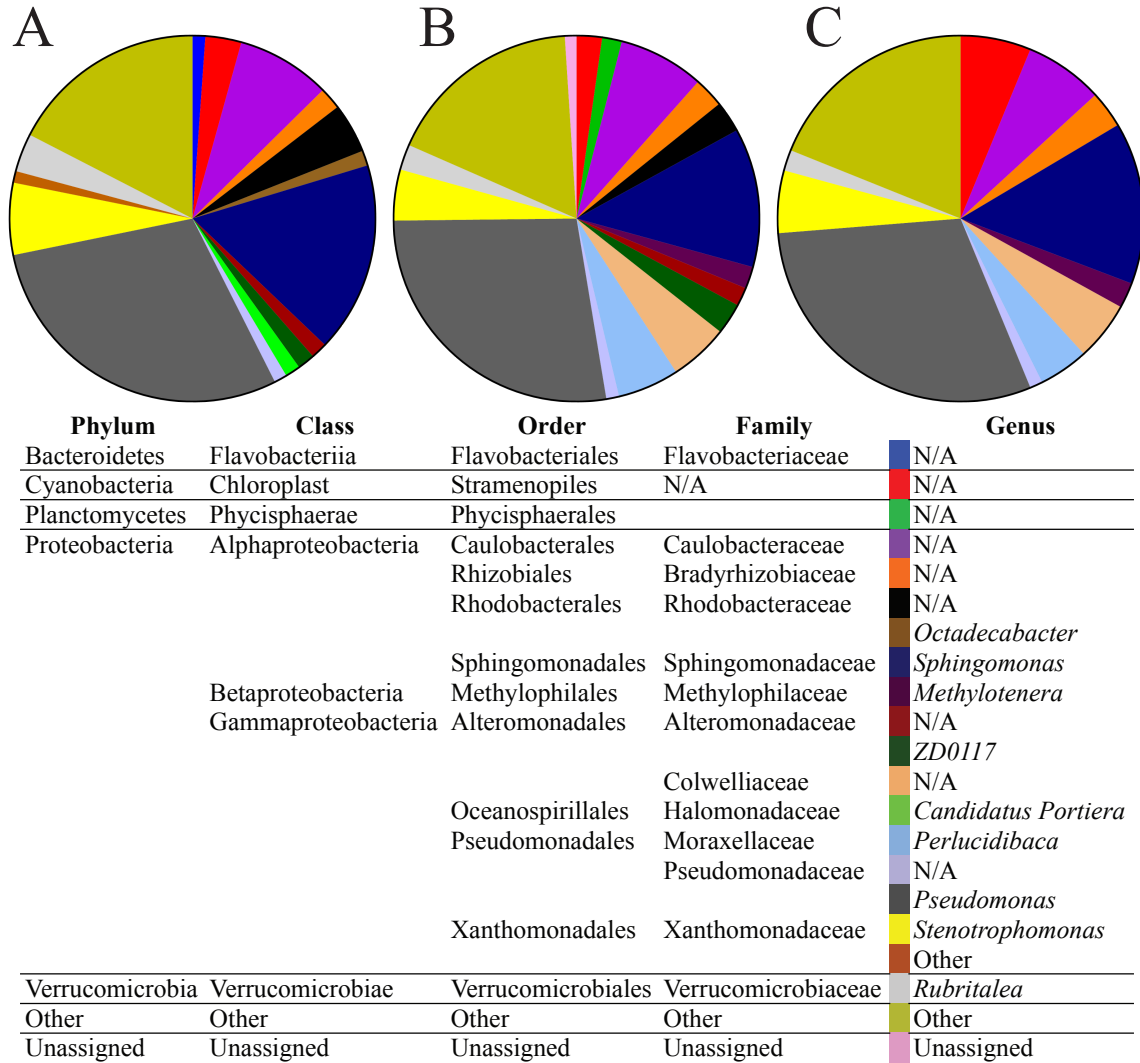

**Supplementary Figure 5.** Distribution of bacterial taxa associated with *Mesocentrotus franciscanus* larvae along the phenotypic continuum. Genera associated with *M. franciscanus* larvae pre- (A) and post-expression (B, C) of phenotypic plasticity representing at least 1% of the community, with taxa less than 1% group as ‘other.’ Data correspond with Figure 2B.

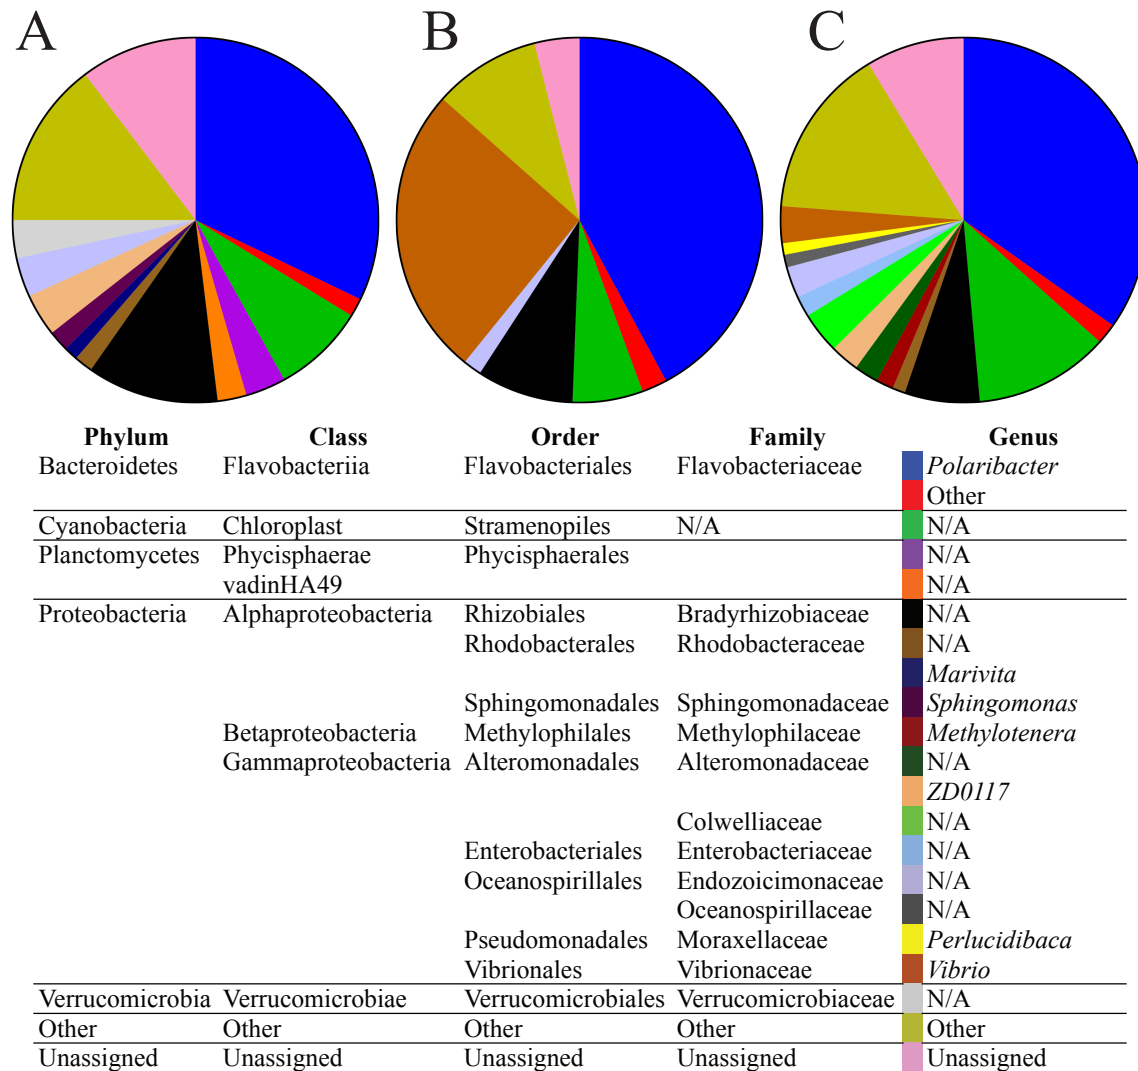

**Supplementary Figure 6.** Distribution of bacterial taxa associated with *Strongylocentrotus droebachiensis* larvae along the phenotypic continuum. Genera associated with *S. droebachiensis* larvae pre- (A) and post-expression (B, C) of phenotypic plasticity representing at least 1% of the community, with taxa less than 1% group as 'other.' Data correspond with Figure 2C.

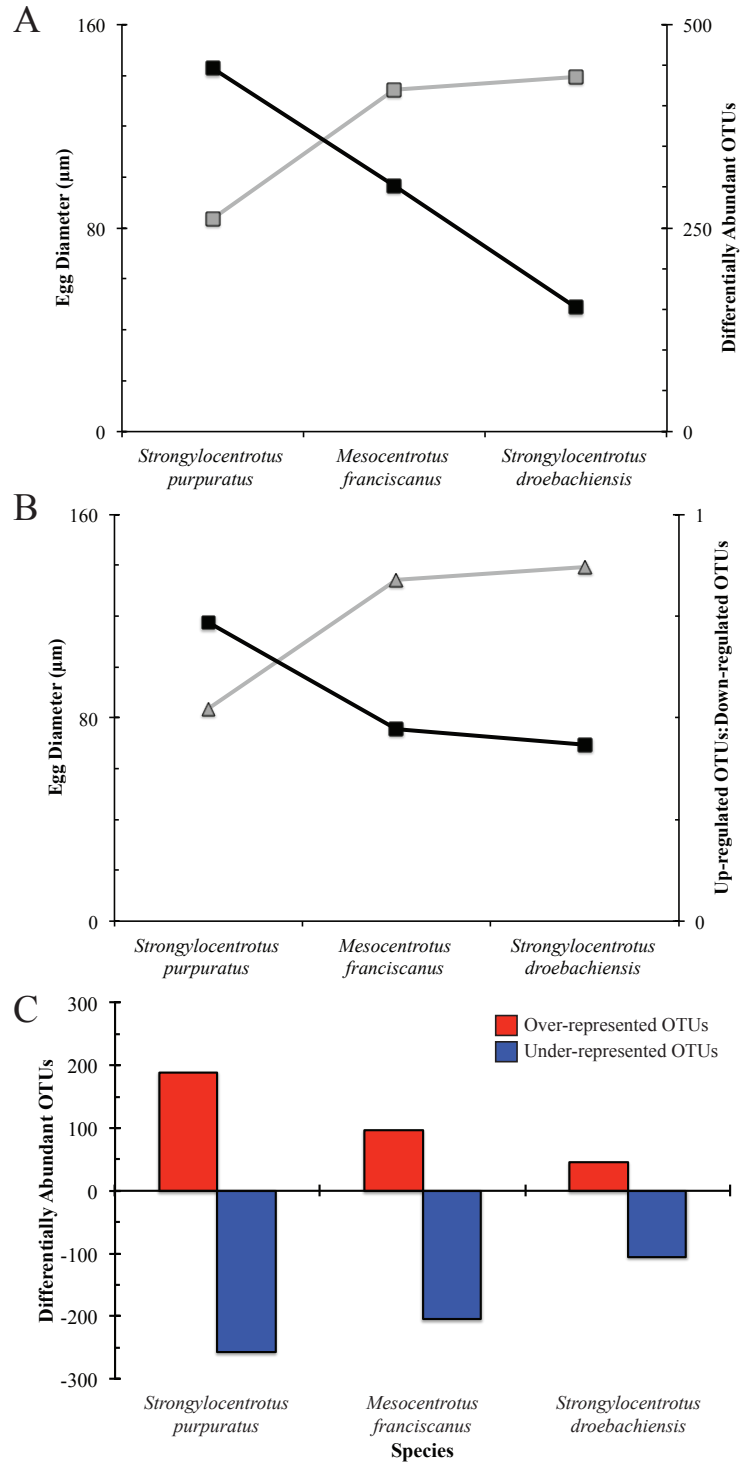

**Supplementary Figure 7.** Differential abundance of OTUs in relation to egg size for three species of echinoid larvae. Total (A, B) and ratio of (C) over- and under-represented OTUs associated with *Strongylocentrotus purpuratus*, *Mesocentrotus franciscanus*, and *S. droebachiensis* larvae following the expression of phenotypic plasticity (black) and in relation to egg size (gray).



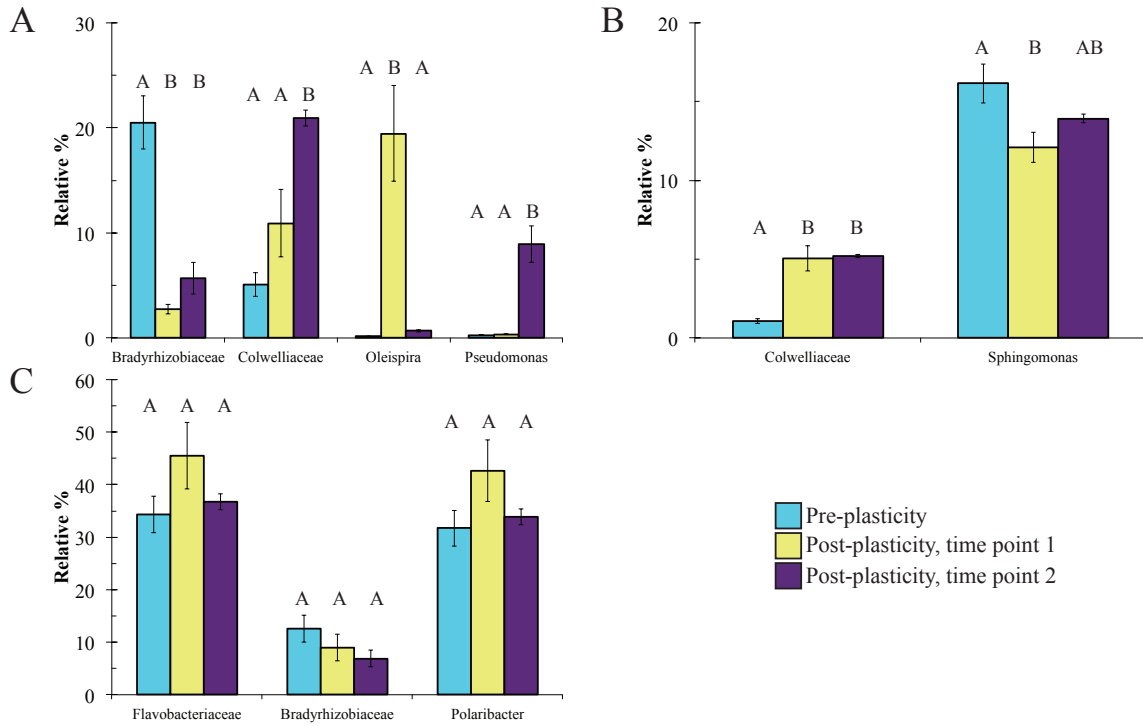

**Supplementary Figure 8.** Specific bacterial taxa within the proteobacteria differentially associated with larvae from three species of echinoid along the phenotypic continuum. Relative presence of specific bacterial taxa associated with *Strongylocentrotus purpuratus* (A), *Mesocentrotus franciscanus* (B), and *S. droebachiensis* (C) pre- (blue) and post-expression (yellow and purple) of phenotypic plasticity. Data correspond with Figure 2D-F.

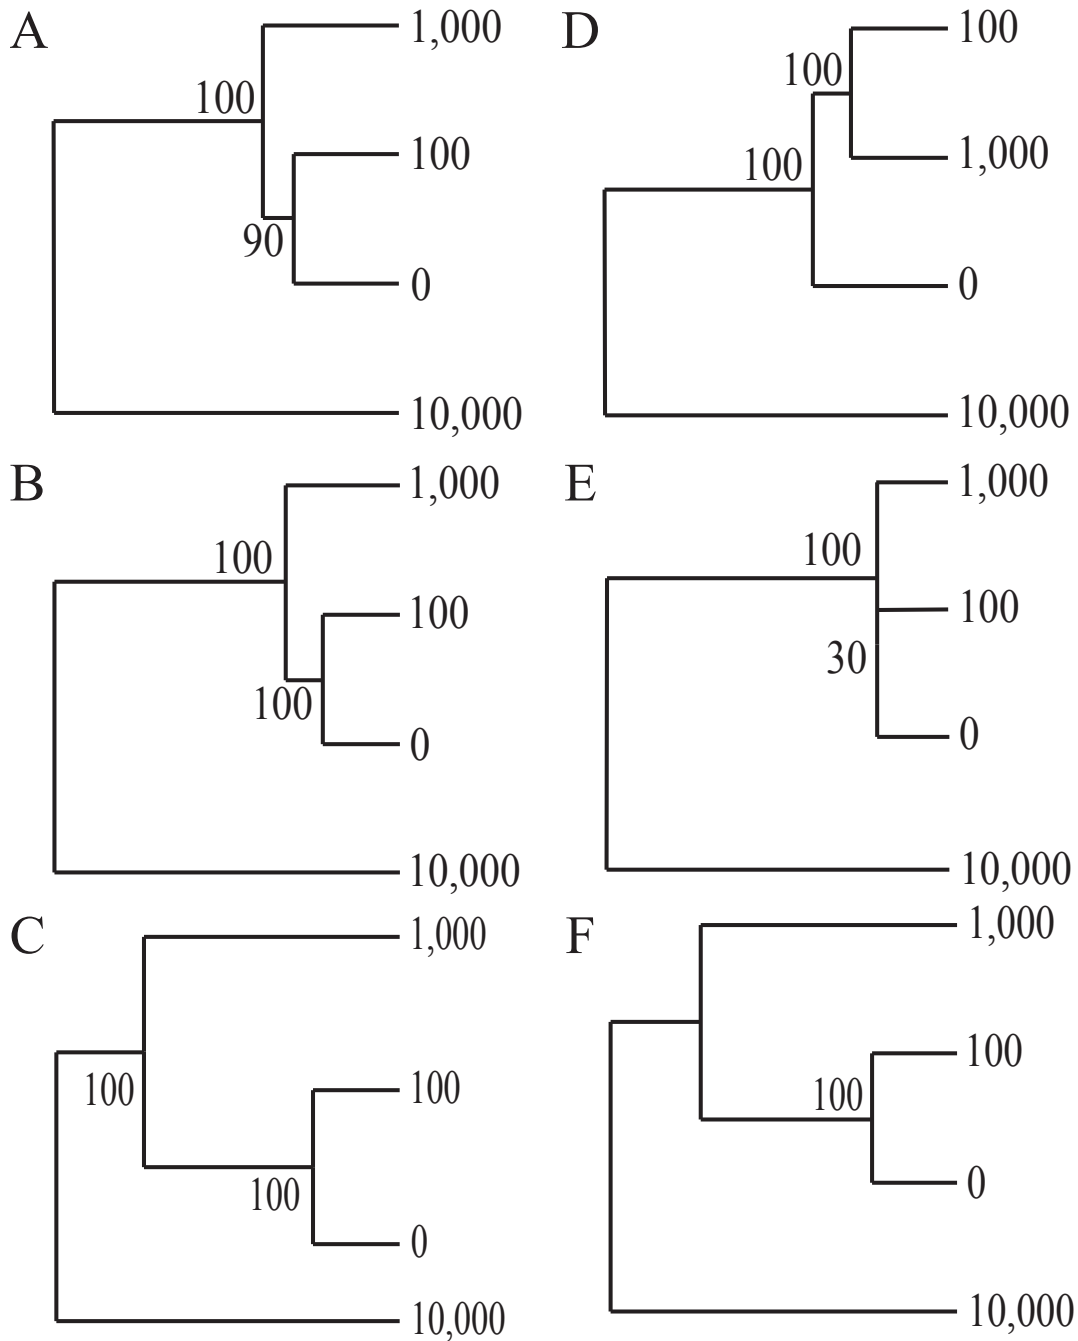

**Supplementary Figure 9.** Similarity between associated microbial community for three species of differentially fed echinoid larvae. Microbial dendrograms of *Strongylocentrotus purpuratus* (A, D), *Mesocentrotus franciscanus* (B, E), and *S. droebachiensis* (C, F) differentially fed at time points pre- (A-C) and post-expression (D-F) of phenotypic plasticity. Data correspond with Figure 4.

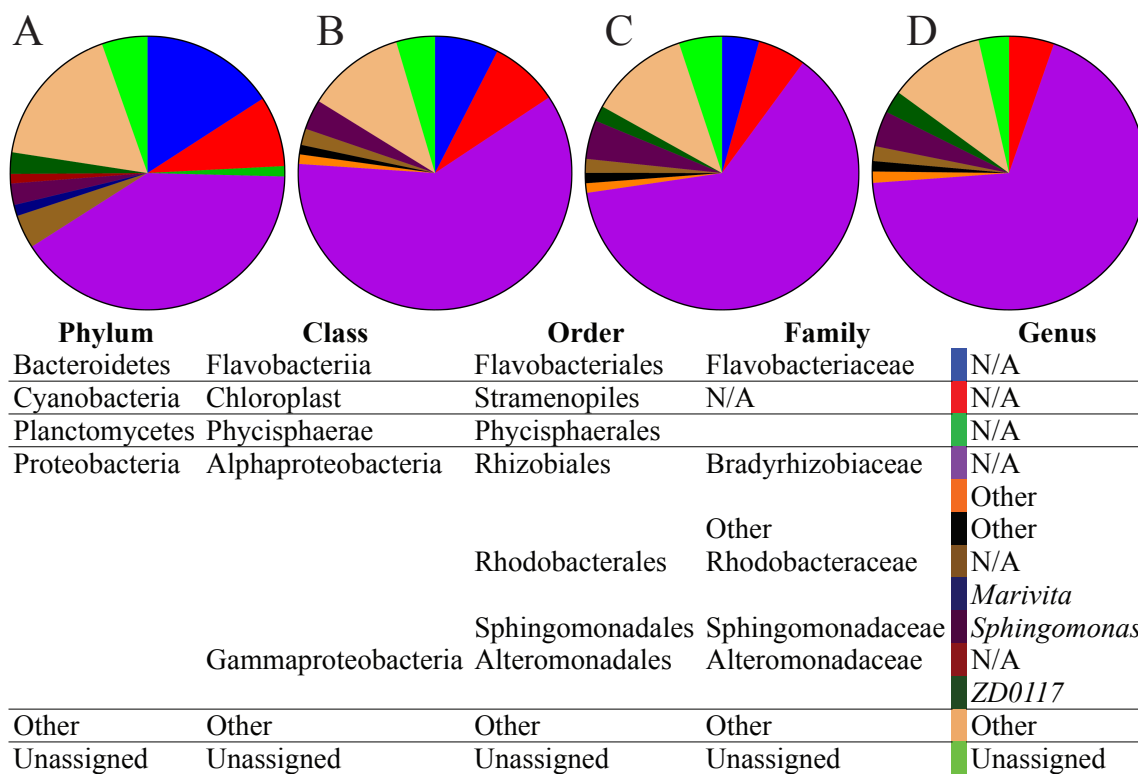

**Supplementary Figure 10.** Distribution of bacterial taxa associated with differentially fed *Strongylocentrotus purpuratus* larvae pre-expression of phenotypic plasticity. Genera associated with *S. purpuratus* larvae fed either 10,000 (A), 1,000 (B), 100 (C), and 0 cells•mL<sup>-1</sup> (D) following one week of differential feeding representing at least 1% of the community, with taxa less than 1% group as ‘other.’ Data correspond with Figure 4A.

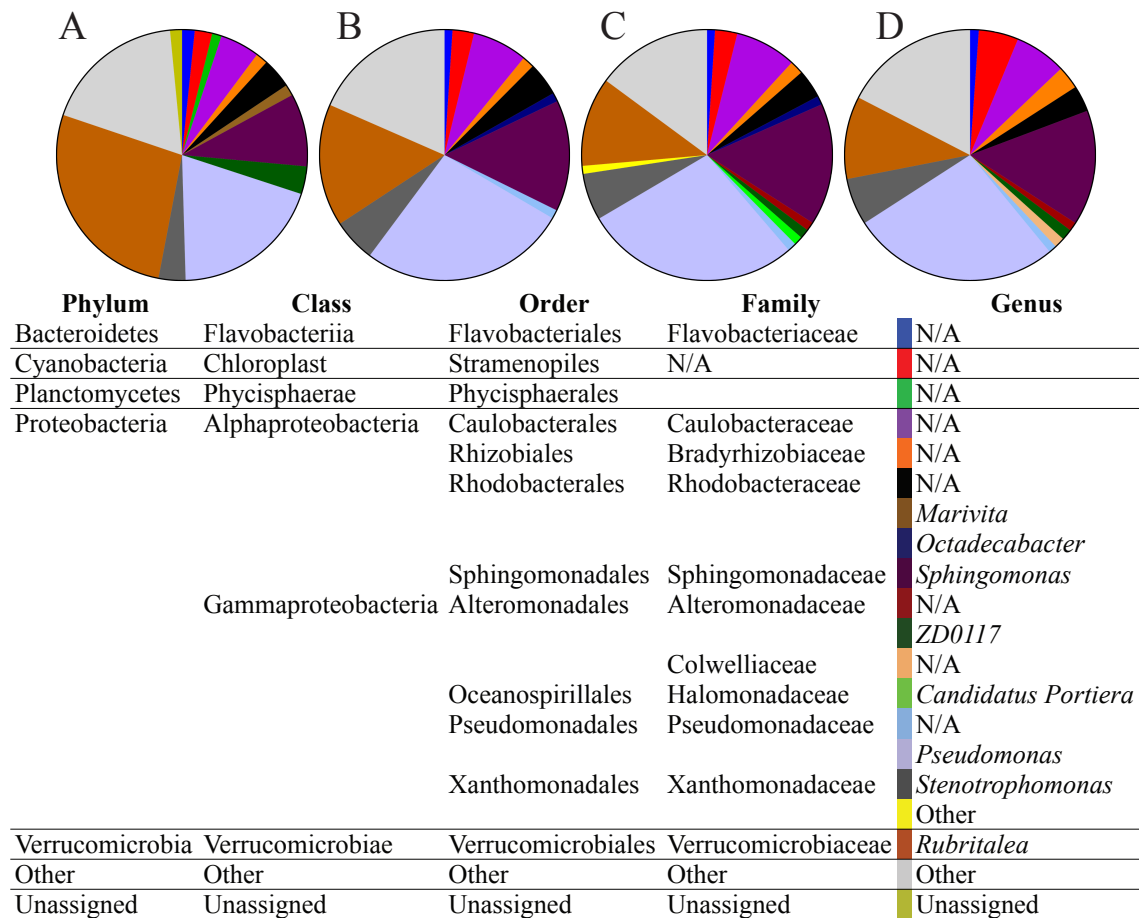

**Supplementary Figure 11.** Distribution of bacterial taxa associated with differentially fed *Mesocentrotus franciscanus* larvae pre-expression of phenotypic plasticity. Genera associated with *M. franciscanus* larvae fed either 10,000 (A), 1,000 (B), 100 (C), and 0 cells•mL<sup>-1</sup> (D) following one week of differential feeding representing at least 1% of the community, with taxa less than 1% group as ‘other.’ Data correspond with Figure 4B.

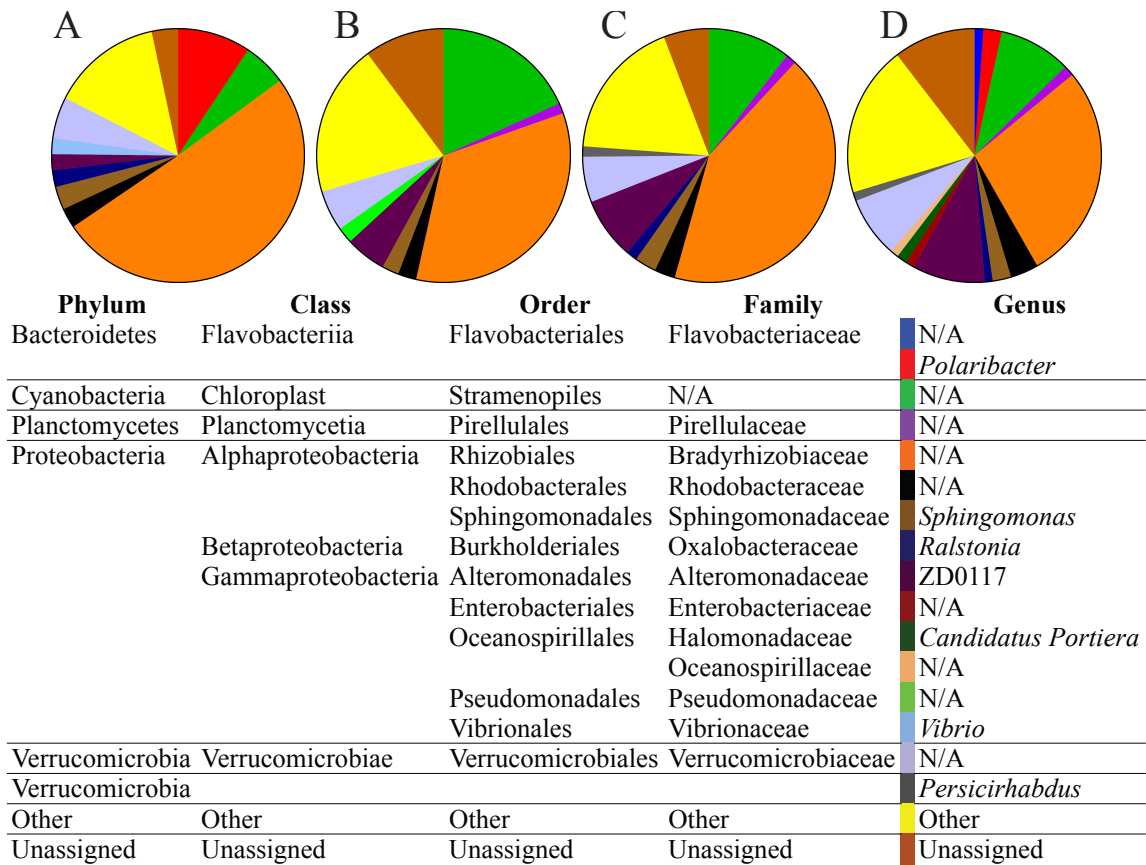

**Supplementary Figure 12.** Distribution of bacterial taxa associated with differentially fed *Strongylocentrotus droebachiensis* larvae pre-expression of phenotypic plasticity. Genera associated with *S. droebachiensis* larvae fed either 10,000 (A), 1,000 (B), 100 (C), and 0 cells•mL<sup>-1</sup> (D) following one week of differential feeding representing at least 1% of the community, with taxa less than 1% group as ‘other.’ Data correspond with Figure 4C.

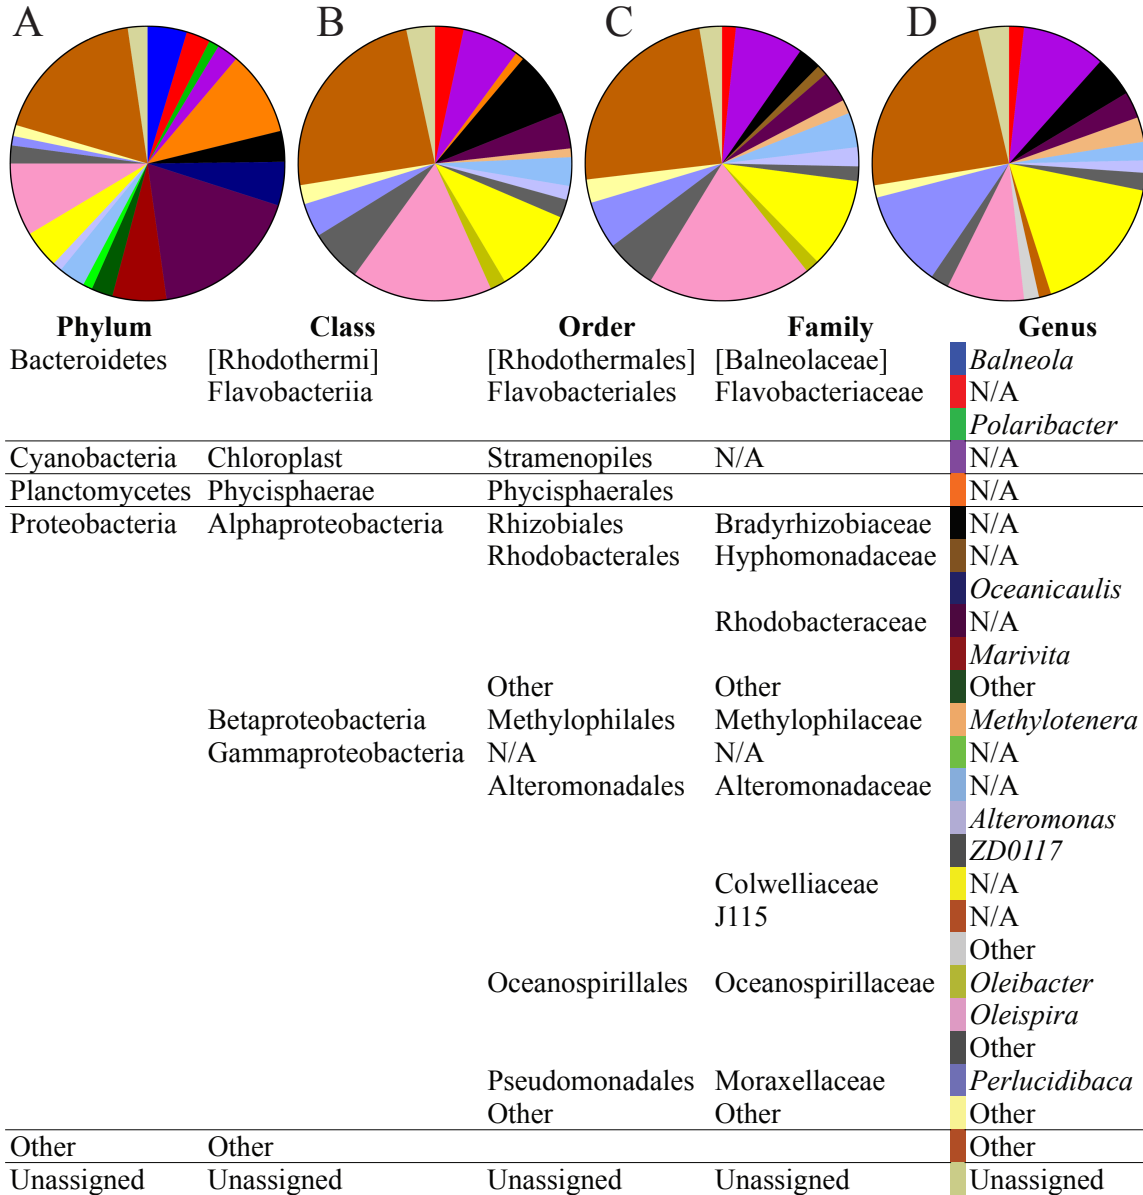

**Supplementary Figure 13.** Distribution of bacterial taxa associated with differentially fed *Strongylocentrotus purpuratus* larvae post-expression of phenotypic plasticity. Genera associated with *S. purpuratus* larvae fed either 10,000 (A), 1,000 (B), 100 (C), and 0 cells•mL<sup>-1</sup> (D) following one week of differential feeding representing at least 1% of the community, with taxa less than 1% group as ‘other.’ Data correspond with Figure 4D.

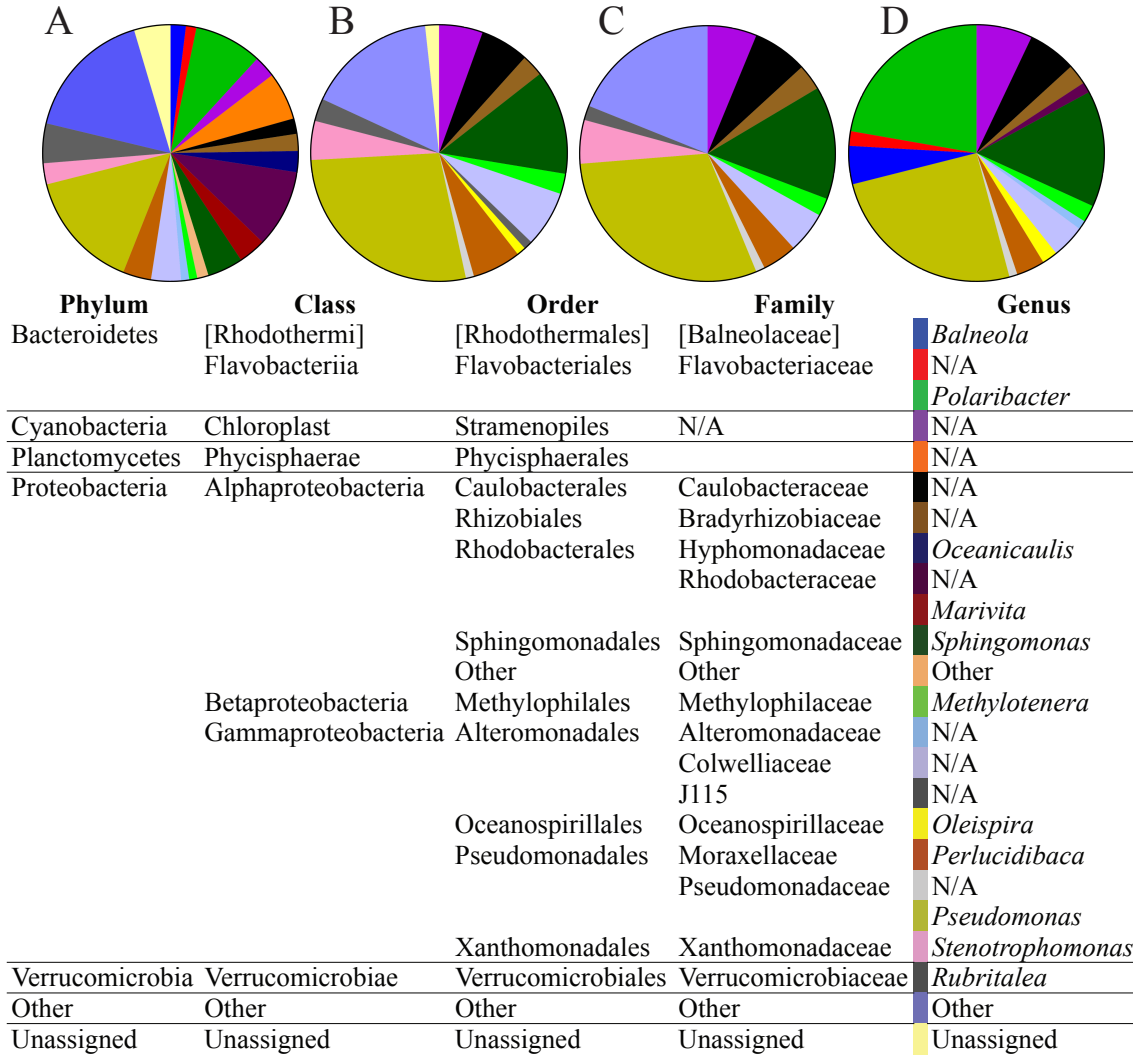

**Supplementary Figure 14.** Distribution of bacterial taxa associated with differentially fed *Mesocentrotus franciscanus* larvae post-expression of phenotypic plasticity. Genera associated with *M. franciscanus* larvae fed either 10,000 (A), 1,000 (B), 100 (C), and 0 cells•mL<sup>-1</sup> (D) following one week of differential feeding representing at least 1% of the community, with taxa less than 1% group as ‘other.’ Data correspond with Figure 4E.

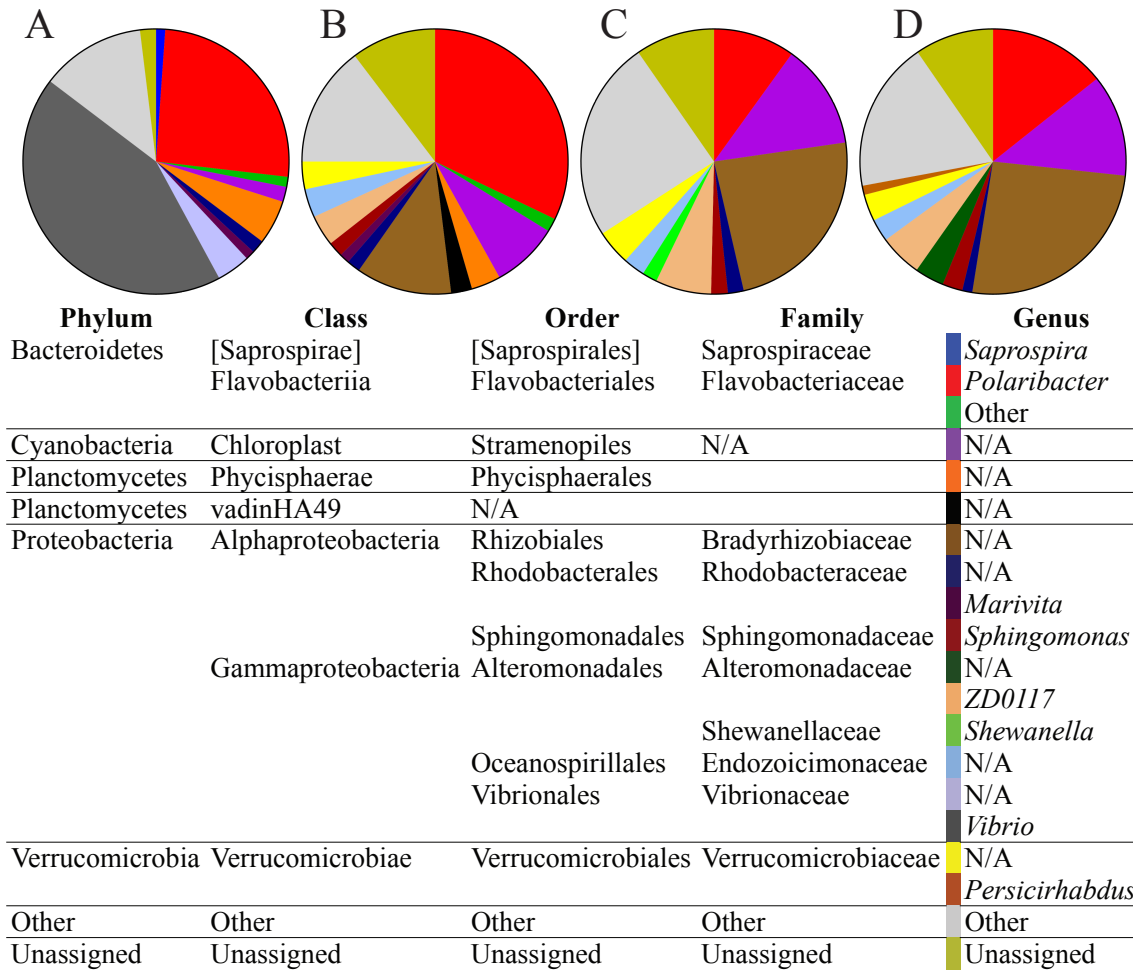

**Supplementary Figure 15.** Distribution of bacterial taxa associated with differentially fed *Strongylocentrotus droebachiensis* larvae post-expression of phenotypic plasticity. Genera associated with *S. droebachiensis* larvae fed either 10,000 (A), 1,000 (B), 100 (C), and 0 cells•mL<sup>-1</sup> (D) following one week of differential feeding representing at least 1% of the community, with taxa less than 1% group as ‘other.’ Data correspond with Figure 4F.



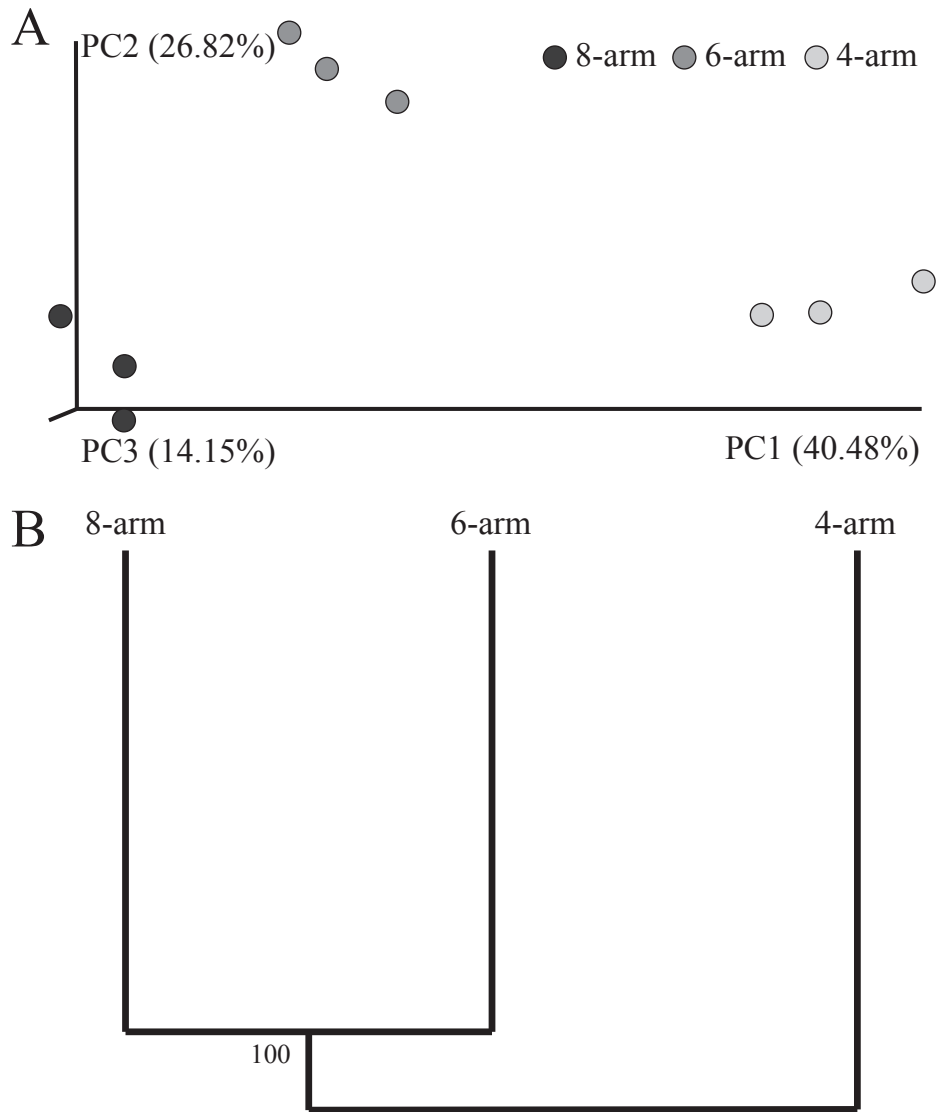

**Supplementary Figure 16.** Developmental stage-specific microbial community for *Strongylocentrotus purpuratus* larvae. Community similarity of the associated microbiota for *Strongylocentrotus purpuratus* larvae at the 4- (light grey), 6- (grey), and 8-arm (black) stages (A), with respective microbial dendrogram (B).

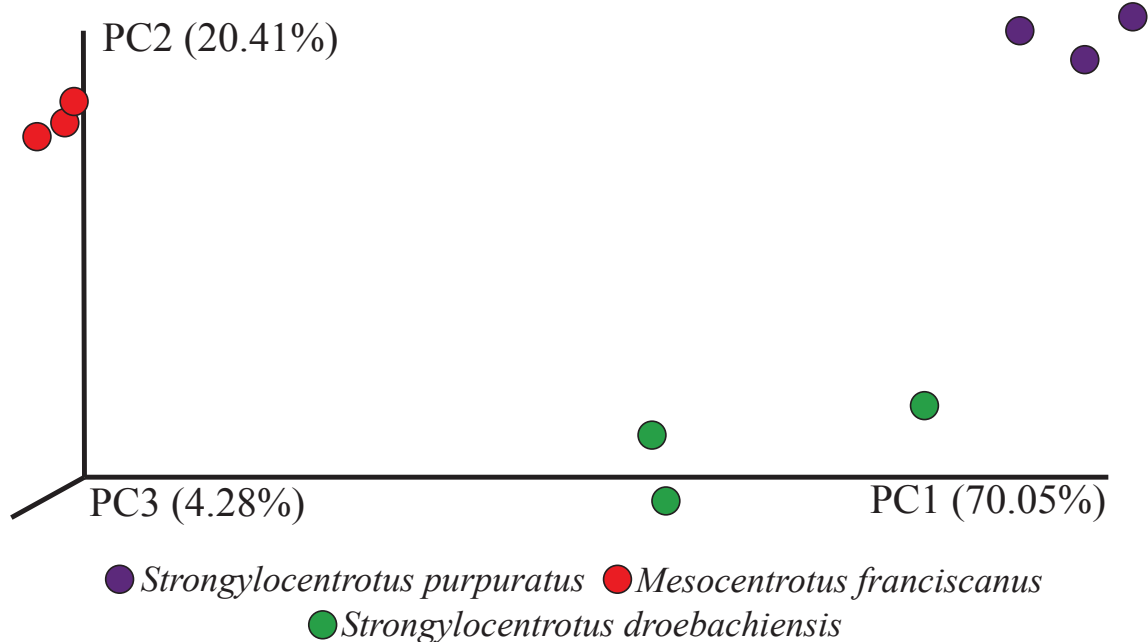

**Supplementary Figure 17.** Species-specific associated microbial communities for three species of echinoid larvae. Community similarity of the associated microbiota for *Strongylocentrotus purpuratus* (purple), *Mesocentrotus franciscanus* (red), and *S. droebachiensis* (green) prior to feeding.

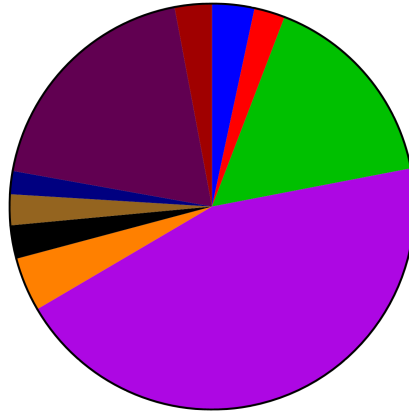

| Phylum         | Class               | Order            | Family            | Genus               |
|----------------|---------------------|------------------|-------------------|---------------------|
| Bacteroidetes  | Flavobacteriia      | Flavobacteriales | Flavobacteriaceae | N/A                 |
| Cyanobacteria  | Chloroplast         | Stramenopiles    | N/A               | <i>Polaribacter</i> |
| Proteobacteria | Alphaproteobacteria | Rhizobiales      | Bradyrhizobiaceae | N/A                 |
|                |                     | Rhodobacterales  | Rhodobacteraceae  | N/A                 |
|                |                     | Sphingomonadales | Sphingomonadaceae | <i>Sphingomonas</i> |
|                | Gammaproteobacteria | Alteromonadales  | Alteromonadaceae  | N/A                 |
|                |                     |                  | Colwelliaceae     | N/A                 |
| Other          | Other               | Other            | Other             | Other               |
| Unassigned     | Unassigned          | Unassigned       | Unassigned        | Unassigned          |

**Supplementary Figure 18.** Bacterial taxa associated with prefeeding *Strongylocentrotus purpuratus* larvae. Genera associated with *S. purpuratus* larvae prior to feeding representing at least 1% of the community, with taxa less than 1% group as ‘other.’ Data correspond with Supplementary Figure 18.

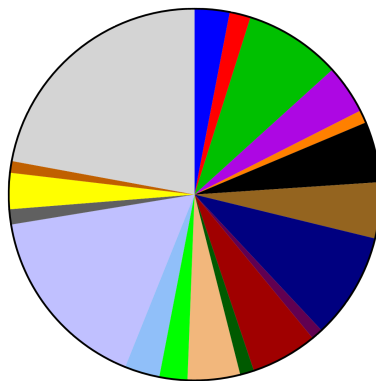

| Phylum         | Class               | Order             | Family                 | Genus                    |                  |
|----------------|---------------------|-------------------|------------------------|--------------------------|------------------|
| Bacteroidetes  | [Saprospirae]       | [Saprospirales]   | Saprospiraceae         | N/A                      |                  |
|                | Flavobacteriia      | Flavobacteriales  | Cryomorphaceae         | <i>Crocinitomix</i>      |                  |
|                |                     |                   | Flavobacteriaceae      | N/A                      |                  |
| Cyanobacteria  | Chloroplast         | Stramenopiles     | N/A                    | N/A                      |                  |
| Proteobacteria | Alphaproteobacteria | Caulobacterales   | Caulobacteraceae       | N/A                      |                  |
|                |                     | Rhodobacterales   | Rhodobacteraceae       | N/A                      |                  |
|                |                     | Sphingomonadales  | Sphingomonadaceae      | <i>Sphingomonas</i>      |                  |
|                | Gammaproteobacteria | Alteromonadales   | Alteromonadales        | N/A                      | N/A              |
|                |                     |                   |                        | Alteromonadaceae         | N/A              |
|                |                     | Oceanospirillales | Colwelliaceae          | N/A                      |                  |
|                |                     |                   | Oceanospirillaceae     | <i>Marinomonas</i>       |                  |
|                |                     |                   | Pseudomonadales        | Pseudomonadaceae         | <i>Oleispira</i> |
|                |                     | Vibrionales       | Pseudoalteromonadaceae | <i>Pseudoalteromonas</i> |                  |
|                |                     | Xanthomonadales   | Xanthomonadaceae       | <i>Stenotrophomonas</i>  |                  |
|                | Other               | Other             | Other                  |                          |                  |
|                | Other               | Other             | Other                  | Other                    |                  |

**Supplementary Figure 19.** Bacterial taxa associated with prefeeding *Mesocentrotus franciscanus* larvae. Genera associated with *M. franciscanus* larvae prior to feeding representing at least 1% of the community, with taxa less than 1% group as ‘other.’ Data correspond with Supplementary Figure 18.

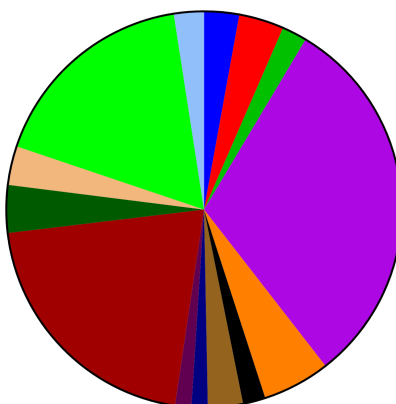

| Phylum         | Class               | Order             | Family             | Genus               |
|----------------|---------------------|-------------------|--------------------|---------------------|
| Bacteroidetes  | Flavobacteriia      | Flavobacteriales  | Flavobacteriaceae  | N/A                 |
| Cyanobacteria  | Chloroplast         | Stramenopiles     | N/A                | <i>Polaribacter</i> |
| Proteobacteria | Alphaproteobacteria | Rhizobiales       | Bradyrhizobiaceae  | N/A                 |
|                |                     | Rhodobacterales   | Rhodobacteraceae   | N/A                 |
|                |                     | Sphingomonadales  | Sphingomonadaceae  | <i>Sphingomonas</i> |
|                | Gammaproteobacteria | Alteromonadales   | Alteromonadaceae   | N/A                 |
|                |                     |                   | Colwelliaceae      | N/A                 |
|                |                     | Oceanospirillales | Oceanospirillaceae | N/A                 |
|                |                     | Vibrionales       | Vibrionaceae       | <i>Marinomonas</i>  |
|                |                     |                   |                    | N/A                 |
|                |                     |                   |                    | <i>Vibrio</i>       |
| Other          | Other               | Other             | Other              | Other               |
| Unassigned     | Unassigned          | Unassigned        | Unassigned         | Unassigned          |

**Supplementary Figure 20.** Bacterial taxa associated with prefeeding *Strongylocentrotus droebachiensis* larvae. Genera associated with *S. droebachiensis* larvae prior to feeding representing at least 1% of the community, with taxa less than 1% group as ‘other.’ Data correspond with Supplementary Figure 18.

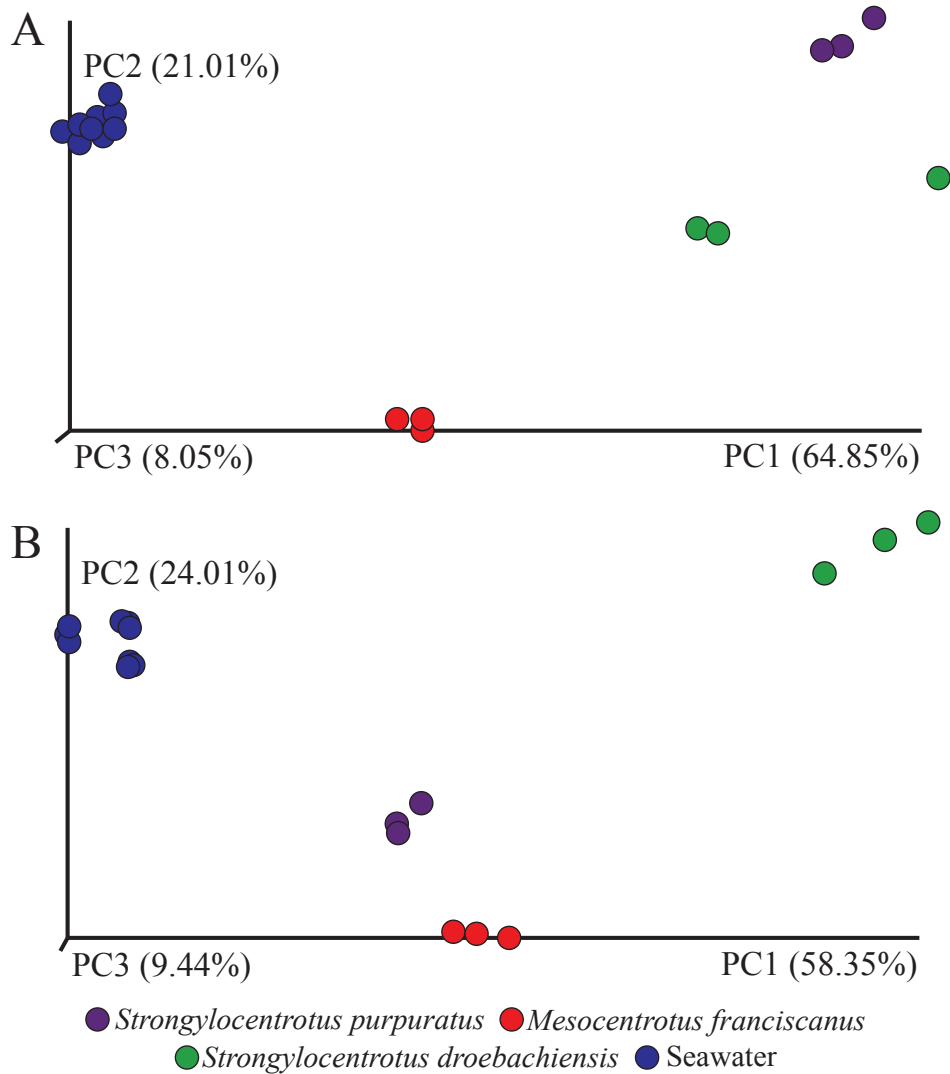

**Supplementary Figure 21.** Similarity of the associated microbial community for three species of echinoids at two larval stages. Community similarity of the associated microbiota for *Strongylocentrotus purpuratus* (purple), *Mesocentrotus franciscanus* (red), and *S. droebachiensis* (green) and seawater (blue) pre- (A) and post-feeding (B).

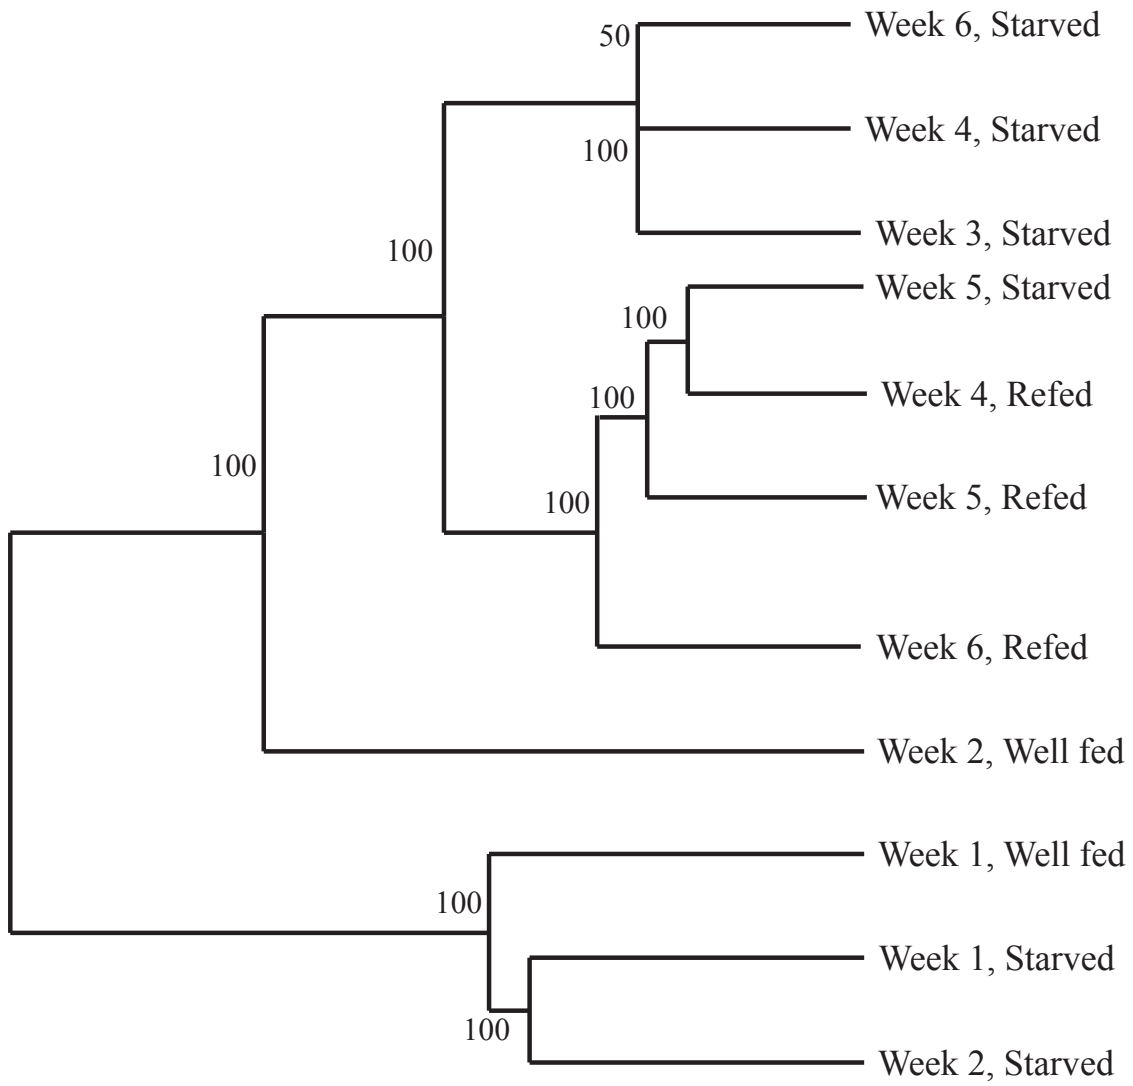

**Supplementary Figure 22.** Similarity between associated microbial communities for dietarily manipulated larvae. Microbial dendrograms of *Strongylocentrotus droebachiensis* larvae fed 10,000 cells•mL<sup>-1</sup> until metamorphosis and 0 cells•mL<sup>-1</sup> for three weeks, versus larvae fed 0 cells•mL<sup>-1</sup> for three weeks then switched to 10,000 cells•mL<sup>-1</sup> until metamorphosis. Data correspond with Figure 6.

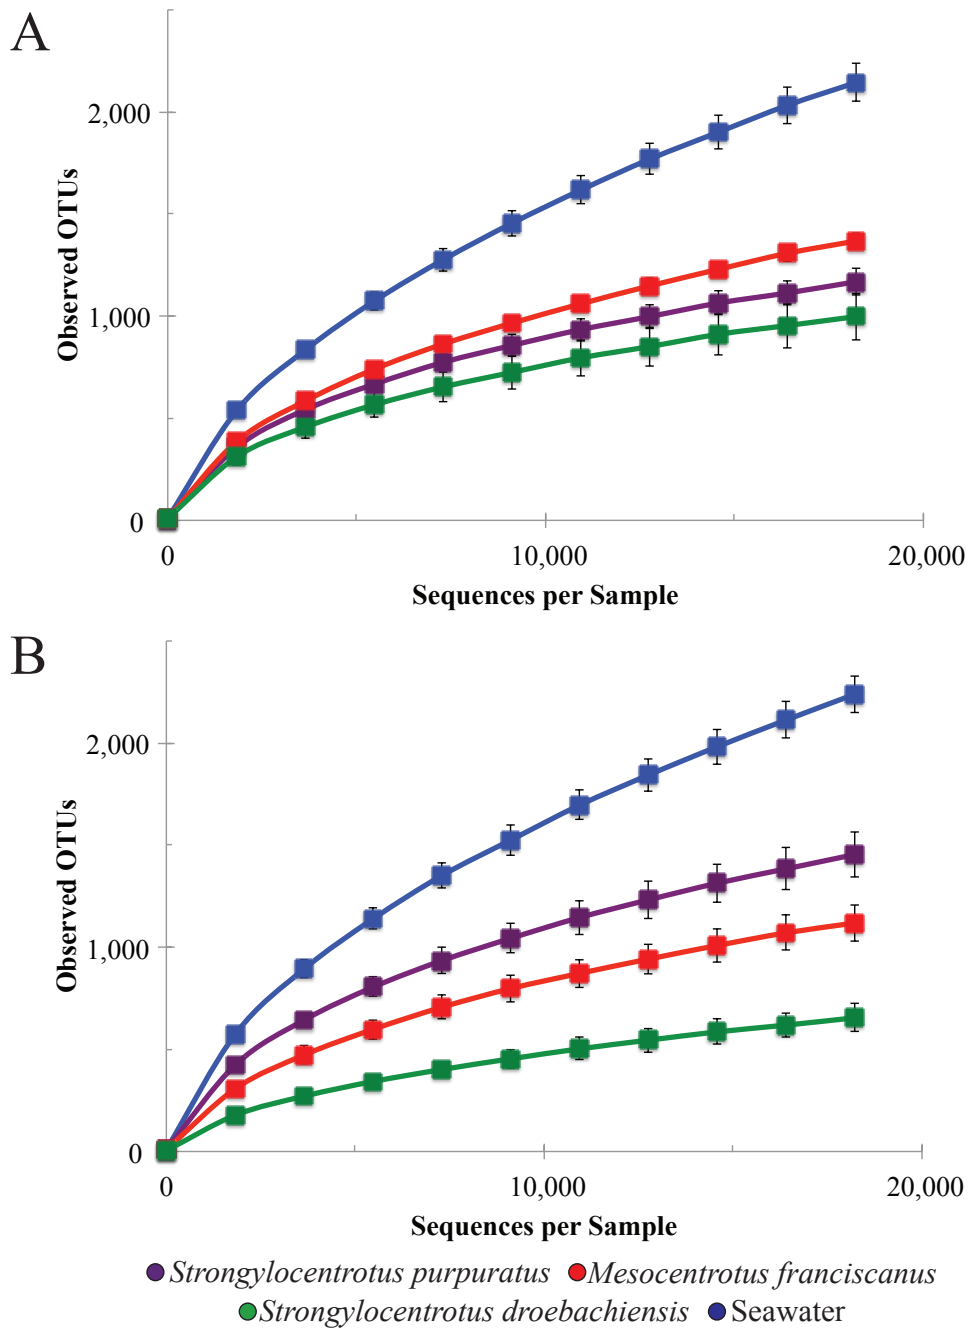

**Supplementary Figure 23.** Alpha rarefaction curves for three species of echinoids at two larval stages and of the seawater. Alpha rarefaction curves for *Strongylocentrotus purpuratus* (purple), *Mesocentrotus franciscanus* (red), and *S. droebachiensis* (green) and seawater (blue) pre- (A) and post-feeding (B) based on rarefaction depth (*i.e.*, 18,225) used for all PCoA plots.



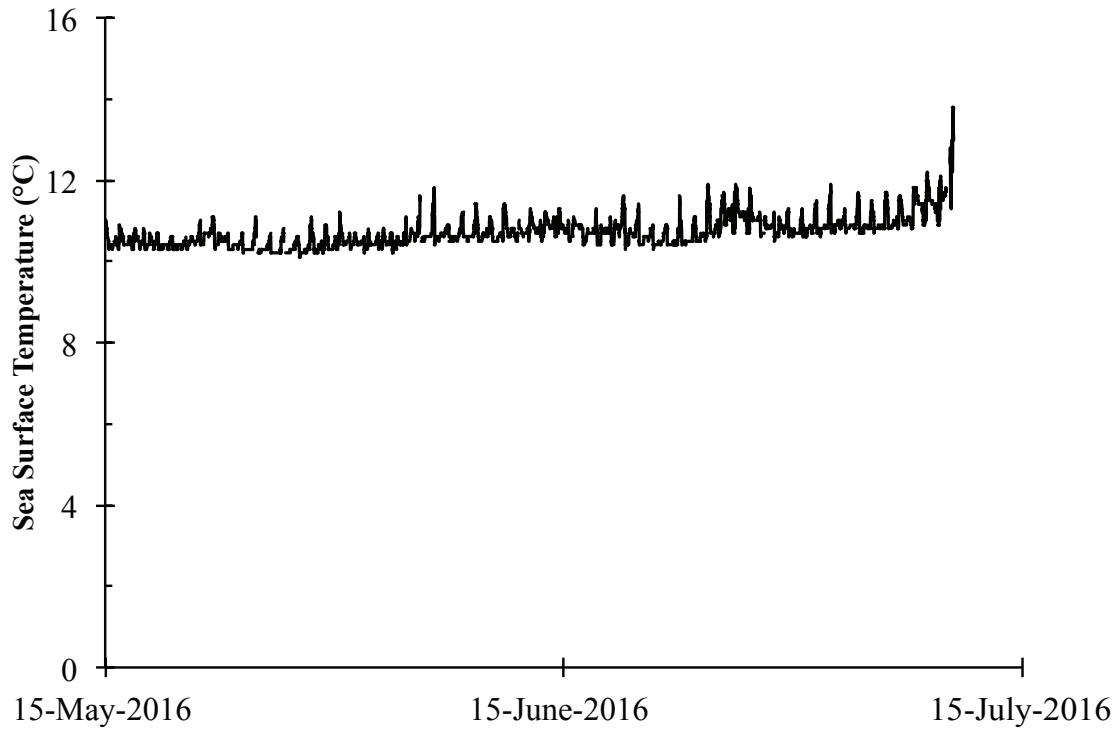

**Supplementary Figure 24.** *in situ* measurements of sea surface temperature at Friday Harbor, WA. Sea surface temperature at Friday Harbor, WA (NOAA station, FRDW1; 48°32'43" N 123°0'44" W) for the entirety of larval experimentation (15 May 2016 – 15 July 2016).

**Supplementary Table 1.** Larval developmental stages across dietary states ('--' designating no sample)

|                                          |               |               |               |               |               |
|------------------------------------------|---------------|---------------|---------------|---------------|---------------|
| <i>Strongylocentrotus purpuratus</i>     | <b>Week 1</b> | <b>Week 2</b> | <b>Week 3</b> | <b>Week 4</b> |               |
| <b>Diet = 10,000</b>                     | 4-arm         | 4-, 6-arm     | 8-arm         | 8-arm         |               |
| <b>Diet = 1,000</b>                      | 4-arm         | 4-arm         | 6-arm         | 6-, 8-arm     |               |
| <b>Diet = 100</b>                        | 4-arm         | 4-arm         | 4-arm         | 4-arm         |               |
| <b>Diet = 0</b>                          | 4-arm         | 4-arm         | 4-arm         | --            |               |
| <i>Mesocentrotus franciscanus</i>        | <b>Week 1</b> | <b>Week 2</b> | <b>Week 3</b> | <b>Week 4</b> |               |
| <b>Diet = 10,000</b>                     | 4-arm         | 8-arm         | 8-arm         | 8-arm         |               |
| <b>Diet = 1,000</b>                      | 4-arm         | 6-arm         | 6-arm         | 6-arm         |               |
| <b>Diet = 100</b>                        | 4-arm         | 4-arm         | 4-arm         | 4-arm         |               |
| <b>Diet = 0</b>                          | 4-arm         | 4-arm         | 4-arm         | 4-arm         |               |
| <i>Strongylocentrotus droebachiensis</i> | <b>Week 1</b> | <b>Week 2</b> | <b>Week 3</b> | <b>Week 4</b> | <b>Week 5</b> |
| <b>Diet = 10,000</b>                     | 6-arm         | 8-arm         | --            | --            | --            |
| <b>Diet = 1,000</b>                      | 6-arm         | 6-arm         | 6-arm         | 6-arm         | --            |
| <b>Diet = 100</b>                        | 4-arm         | 4-arm         | 4-arm         | 4-arm         | --            |
| <b>Diet = 0</b>                          | 4-arm         | 4-arm         | 4-arm         | 4-arm         | 4-arm         |
| <b>Diet = 0 to 10,000</b>                | --            | --            | --            | 6-arm         | 6-, 8-arm     |

**Supplementary Table 2.** Two-way ANOVA results<sup>1</sup> for larval morphology

| <i>Strongylocentrotus purpuratus</i>     | Effect        | df | SS    | F-ratio | p               |
|------------------------------------------|---------------|----|-------|---------|-----------------|
|                                          | Week          | 2  | 0.522 | 29.197  | < <b>0.0001</b> |
|                                          | Diet          | 2  | 2.962 | 165.562 | < <b>0.0001</b> |
|                                          | Week*Diet     | 8  | 1.344 | 18.780  | < <b>0.0001</b> |
|                                          | Week 1        | 3  | 0.301 | 11.199  | < <b>0.0001</b> |
|                                          | Week 2        | 3  | 0.675 | 25.148  | < <b>0.0001</b> |
|                                          | Week 3        | 3  | 1.959 | 73.004  | < <b>0.0001</b> |
|                                          | Week 4        | 3  | 1.557 | 58.023  | < <b>0.0001</b> |
|                                          | Diet = 10,000 | 3  | 0.450 | 16.761  | < <b>0.0001</b> |
|                                          | Diet = 1,000  | 3  | 0.076 | 2.845   | <b>0.038</b>    |
|                                          | Diet = 100    | 3  | 0.331 | 12.326  | < <b>0.0001</b> |
|                                          | Diet = 0      | 3  | 1.092 | 40.714  | < <b>0.0001</b> |
| <i>Mesocentrotus franciscanus</i>        | Effect        | df | SS    | F-ratio | p               |
|                                          | Week          | 2  | 1.115 | 28.748  | < <b>0.0001</b> |
|                                          | Diet          | 2  | 9.714 | 250.410 | < <b>0.0001</b> |
|                                          | Week*Diet     | 8  | 3.627 | 31.168  | < <b>0.0001</b> |
|                                          | Week 1        | 3  | 0.178 | 4.586   | <b>0.0037</b>   |
|                                          | Week 2        | 3  | 2.167 | 55.853  | < <b>0.0001</b> |
|                                          | Week 3        | 3  | 3.480 | 89.700  | < <b>0.0001</b> |
|                                          | Week 4        | 3  | 7.577 | 195.314 | < <b>0.0001</b> |
|                                          | Diet = 10,000 | 3  | 0.864 | 22.285  | < <b>0.0001</b> |
|                                          | Diet = 1,000  | 3  | 0.317 | 8.181   | < <b>0.0001</b> |
|                                          | Diet = 100    | 3  | 0.793 | 20.453  | < <b>0.0001</b> |
|                                          | Diet = 0      | 3  | 2.768 | 71.359  | < <b>0.0001</b> |
| <i>Strongylocentrotus droebachiensis</i> | Effect        | df | SS    | F-ratio | p               |
|                                          | Week          | 1  | 0.923 | 119.776 | < <b>0.0001</b> |
|                                          | Diet          | 2  | 0.137 | 8.876   | <b>0.0002</b>   |
|                                          | Week*Diet     | 7  | 0.591 | 10.956  | < <b>0.0001</b> |
|                                          | Week 1        | 3  | 0.104 | 4.506   | <b>0.0042</b>   |
|                                          | Week 2        | 3  | 0.636 | 27.481  | < <b>0.0001</b> |
|                                          | Week 3        | 3  | 0.109 | 4.733   | <b>0.0031</b>   |
|                                          | Week 4        | 3  | 0.507 | 21.917  | < <b>0.0001</b> |
|                                          | Diet = 10,000 | 3  | 0.807 | 34.879  | < <b>0.0001</b> |
|                                          | Diet = 1,000  | 3  | 0.295 | 12.745  | < <b>0.0001</b> |
|                                          | Diet = 100    | 3  | 0.166 | 7.198   | <b>0.0001</b>   |
|                                          | Diet = 0      | 3  | 0.738 | 31.897  | < <b>0.0001</b> |

<sup>1</sup> df: degrees of freedom; SS: sum-of-squares; F-ratio: F-statistic

**Supplementary Table 3.** Two-way ANOVA results<sup>2</sup> for larval stomach volume

| <i>Strongylocentrotus purpuratus</i>     | Effect        | df | SS      | F-ratio | p               |
|------------------------------------------|---------------|----|---------|---------|-----------------|
|                                          | Week          | 2  | 4.5E+15 | 84.754  | < <b>0.0001</b> |
|                                          | Diet          | 2  | 3.3E+16 | 622.449 | < <b>0.0001</b> |
|                                          | Week*Diet     | 8  | 3.0E+16 | 140.378 | < <b>0.0001</b> |
|                                          | Week 1        | 3  | 4.0E+14 | 4.653   | <b>0.003</b>    |
|                                          | Week 2        | 3  | 3.0E+13 | 0.335   | 0.800           |
|                                          | Week 3        | 3  | 4.0E+14 | 5.198   | <b>0.002</b>    |
|                                          | Week 4        | 3  | 5.0E+16 | 601.434 | < <b>0.0001</b> |
|                                          | Diet = 10,000 | 3  | 8.0E+13 | 1.002   | 0.392           |
|                                          | Diet = 1,000  | 3  | 3.0E+14 | 4.334   | <b>0.005</b>    |
|                                          | Diet = 100    | 3  | 2.0E+16 | 247.235 | < <b>0.0001</b> |
|                                          | Diet = 0      | 3  | 5.0E+16 | 574.317 | < <b>0.0001</b> |
| <i>Mesocentrotus franciscanus</i>        | Effect        | df | SS      | F-ratio | p               |
|                                          | Week          | 3  | 9.4E+16 | 103.686 | < <b>0.0001</b> |
|                                          | Diet          | 3  | 3.1E+17 | 343.181 | < <b>0.0001</b> |
|                                          | Week*Diet     | 9  | 2.5E+17 | 92.261  | < <b>0.0001</b> |
|                                          | Week 1        | 3  | 2.0E+14 | 0.188   | 0.9045          |
|                                          | Week 2        | 3  | 9.0E+13 | 0.095   | 0.9626          |
|                                          | Week 3        | 3  | 2.0E+15 | 2.316   | 0.0758          |
|                                          | Week 4        | 3  | 3.0E+17 | 377.871 | < <b>0.0001</b> |
|                                          | Diet = 10,000 | 3  | 2.0E+15 | 1.657   | 0.1763          |
|                                          | Diet = 1,000  | 3  | 3.0E+15 | 3.187   | <b>0.0241</b>   |
|                                          | Diet = 100    | 3  | 1.0E+17 | 164.025 | < <b>0.0001</b> |
|                                          | Diet = 0      | 3  | 4.0E+17 | 451.096 | < <b>0.0001</b> |
| <i>Strongylocentrotus droebachiensis</i> | Effect        | df | SS      | F-ratio | p               |
|                                          | Week          | 1  | 1.7E+15 | 76.456  | < <b>0.0001</b> |
|                                          | Diet          | 2  | 2.0E+14 | 4.618   | <b>0.0107</b>   |
|                                          | Week*Diet     | 7  | 2.9E+15 | 19.198  | < <b>0.0001</b> |
|                                          | Week 1        | 3  | 2.0E+13 | 0.344   | 0.7934          |
|                                          | Week 2        | 3  | 3.0E+13 | 0.393   | 0.7585          |
|                                          | Week 3        | 3  | 1.0E+14 | 1.791   | 0.1493          |
|                                          | Week 4        | 3  | 5.0E+15 | 69.420  | < <b>0.0001</b> |
|                                          | Diet = 10,000 | 3  | 3.0E+15 | 42.776  | < <b>0.0001</b> |
|                                          | Diet = 1,000  | 3  | 2.0E+16 | 254.487 | < <b>0.0001</b> |
|                                          | Diet = 100    | 3  | 1.0E+15 | 15.247  | < <b>0.0001</b> |
|                                          | Diet = 0      | 3  | 6.0E+14 | 8.374   | < <b>0.0001</b> |

<sup>2</sup> df: degrees of freedom; SS: sum-of-squares; F-ratio: F-statistic

**Supplementary Table 4.** One-way ANOVA results<sup>3</sup> for trade-off in associating with proteobacteria across phenotypes

| <i>Strongylocentrotus purpuratus</i>     |                          | Effect    | <i>df</i> | SS    | <i>F</i> -ratio | <i>p</i>     |
|------------------------------------------|--------------------------|-----------|-----------|-------|-----------------|--------------|
|                                          | $\alpha$ -proteobacteria | Phenotype | 2         | 0.059 | 19.524          | <b>0.002</b> |
|                                          | $\gamma$ -proteobacteria | Phenotype | 2         | 0.070 | 17.271          | <b>0.003</b> |
| <i>Mesocentrotus franciscanus</i>        |                          | Effect    | <i>df</i> | SS    | <i>F</i> -ratio | <i>p</i>     |
|                                          | $\alpha$ -proteobacteria | Phenotype | 2         | 0.008 | 12.548          | <b>0.011</b> |
|                                          | $\gamma$ -proteobacteria | Phenotype | 2         | 0.007 | 19.194          | <b>0.005</b> |
| <i>Strongylocentrotus droebachiensis</i> |                          | Effect    | <i>df</i> | SS    | <i>F</i> -ratio | <i>p</i>     |
|                                          | $\alpha$ -proteobacteria | Phenotype | 2         | 0.013 | 2.964           | 0.142        |
|                                          | $\gamma$ -proteobacteria | Phenotype | 2         | 0.013 | 0.532           | 0.618        |

---

<sup>3</sup> *df*: degrees of freedom; SS: sum-of-squares; *F*-ratio: F-statistic

**Supplementary Table 5.** ANOVA results<sup>4</sup> for differentially-associated taxa across phenotypes

| <i>Strongylocentrotus purpuratus</i>     |                     | Effect    | <i>df</i> | SS    | <i>F</i> -ratio | <i>p</i>     |
|------------------------------------------|---------------------|-----------|-----------|-------|-----------------|--------------|
|                                          | Bradyrhizobiaceae   | Phenotype | 2         | 0.054 | 30.575          | <b>0.001</b> |
|                                          | Colwelliaceae       | Phenotype | 2         | 0.038 | 15.692          | <b>0.004</b> |
|                                          | <i>Oleispira</i>    | Phenotype | 2         | 0.073 | 17.583          | <b>0.003</b> |
|                                          | <i>Pseudomonas</i>  | Phenotype | 2         | 0.015 | 24.554          | <b>0.001</b> |
| <i>Mesocentrotus franciscanus</i>        |                     | Effect    | <i>df</i> | SS    | <i>F</i> -ratio | <i>p</i>     |
|                                          | Colwelliaceae       | Phenotype | 2         | 0.003 | 15.373          | <b>0.007</b> |
|                                          | <i>Sphingomonas</i> | Phenotype | 2         | 0.002 | 5.472           | 0.055        |
| <i>Strongylocentrotus droebachiensis</i> |                     | Effect    | <i>df</i> | SS    | <i>F</i> -ratio | <i>p</i>     |
|                                          | Flavobacteriaceae   | Phenotype | 2         | 0.020 | 1.596           | 0.291        |
|                                          | Bradyrhizobiaceae   | Phenotype | 2         | 0.004 | 1.260           | 0.360        |
|                                          | <i>Polaribacter</i> | Phenotype | 2         | 0.020 | 1.753           | 0.265        |

---

<sup>4</sup> *df*: degrees of freedom; SS: sum-of-squares; *F*-ratio: F-statistic

## Supplementary Note 1. Informatic pipeline for processing 16S rRNA datasets from MiSeq

Starting with raw read files from MiSeq:

- 1) Pair forward and reverse files using PEAR (pear-0.9.10-bin-64)
- 2) Trim paired files using Trimmomatic (trimmomatic-0.36.jar)
- 3) Convert paired and trimmed .fastq to .fasta using the custom code: `cat [input .fastq] | paste - - - - | cut -f 1,2 | sed 's/^/>/' | tr "\t" "\n" >[output .fasta]`
- 4) Validate tab-delimited mapping file using "validate\_mapping\_file.py"
- 5) Generate meta-.fasta files using "add\_qiime\_labels.py"
- 6) Detect chimeras from meta-.fasta (called, "combined\_seqs.fna")
- 7) Filter chimeras using "filter\_fasta.py"
- 8) Pick OTUs using "pick\_open\_reference\_otus.py"
- 9) Filter OTUs with >10 reads using "filter\_otus\_from\_otu\_table.py"
- 10) Filter 'o\_\_Cryptophyta' using "filter\_taxa\_from\_otu\_table.py"
- 11) Determine rarefaction depth using "biom summarize-table"
- 12) Split filtered .biom table to test specific hypotheses using "split\_otu\_table.py"
- 13) Comparison of microbial communities via PCoA using "jackknifed\_beta\_diversity.py"
- 14) Statistical comparisons of rarefied matrices using "compare\_categories.py"
- 15) Compare taxa from '13' using "summarize\_taxa\_through\_plots.py"
