# Supplementary material for: Convergent shifts in host-associated microbial communities across environmentally elicited phenotypes
Source: PubMed Central journal article supplement (PMC5838112; doi:10.1038/s41467-018-03383-w), 2018-03-05
Supplement: 41467_2018_3383_MOESM3_ESM.pdf [file 41467_2018_3383_MOESM3_ESM.pdf]

## **Description of Supplementary Files**

File Name: Supplementary Data 1

Description: Cryptophyta sequences extracted from the biom table using 'biom convert' and 'Seq\_Extract.py' in QIIME.

File Name: Supplementary Data 2

Description: BLAST (NCBI) results of the extracted Cryptophyta sequences.

File Name: Supplementary Data 3

Description: Sequences from BLAST result of the extracted Cryptophyta sequences.
